# Supplementary material for: Comprehensive Analysis of RNA Expression Correlations between Biofluids and Human Tissues
Source: MDPI journal article supplement (doi:10.3390/genes12060935), 2021-06-18
Supplement: s1 [file s1]

## **Supplementary materials**

### **Comprehensive analysis of RNA expression correlations between biofluids and human tissues**

Ruya Sun<sup>1</sup>, Chunmei Cui<sup>1</sup>, Yuan Zhou<sup>1</sup>, Qinghua Cui<sup>1\*</sup>

<sup>1</sup>Department of Biomedical Informatics, School of Basic Medical Sciences, Key Laboratory of Molecular Cardiovascular Sciences of the Ministry of Education, Center for Non-coding RNA Medicine, Peking University Health Science Center Beijing, China

Correspondence to:

Qinghua Cui, PhD, Professor

cuiqinghua@hsc.pku.edu.cn

**Table S1. Data source of collected biofluid transcriptome profile**

| Data source | Biofluid type                                                                                                                                                               |
|-------------|-----------------------------------------------------------------------------------------------------------------------------------------------------------------------------|
| exRNA atlas | urine exRNA (n = 70)<br>bile exRNA (n = 30)                                                                                                                                 |
| GSE121869   | serum exRNA (n = 54)<br>plasma exRNA (n = 143)                                                                                                                              |
| GSE99573    | stool seRNA (n = 111)                                                                                                                                                       |
| GSE131689   | urine total RNA (n = 2)<br>urine EV RNA (n = 2)<br>platelet-rich plasma total RNA (n = 6)<br>platelet-poor plasma total RNA (n = 14)<br>platelet-rich plasma EV RNA (n = 2) |
| GSE145796   | saliva EV RNA (n = 10)                                                                                                                                                      |

EV RNA: extracellular vesicle RNA; exRNA: extracellular RNA; seRNA: stool-derived eukaryotic RNA

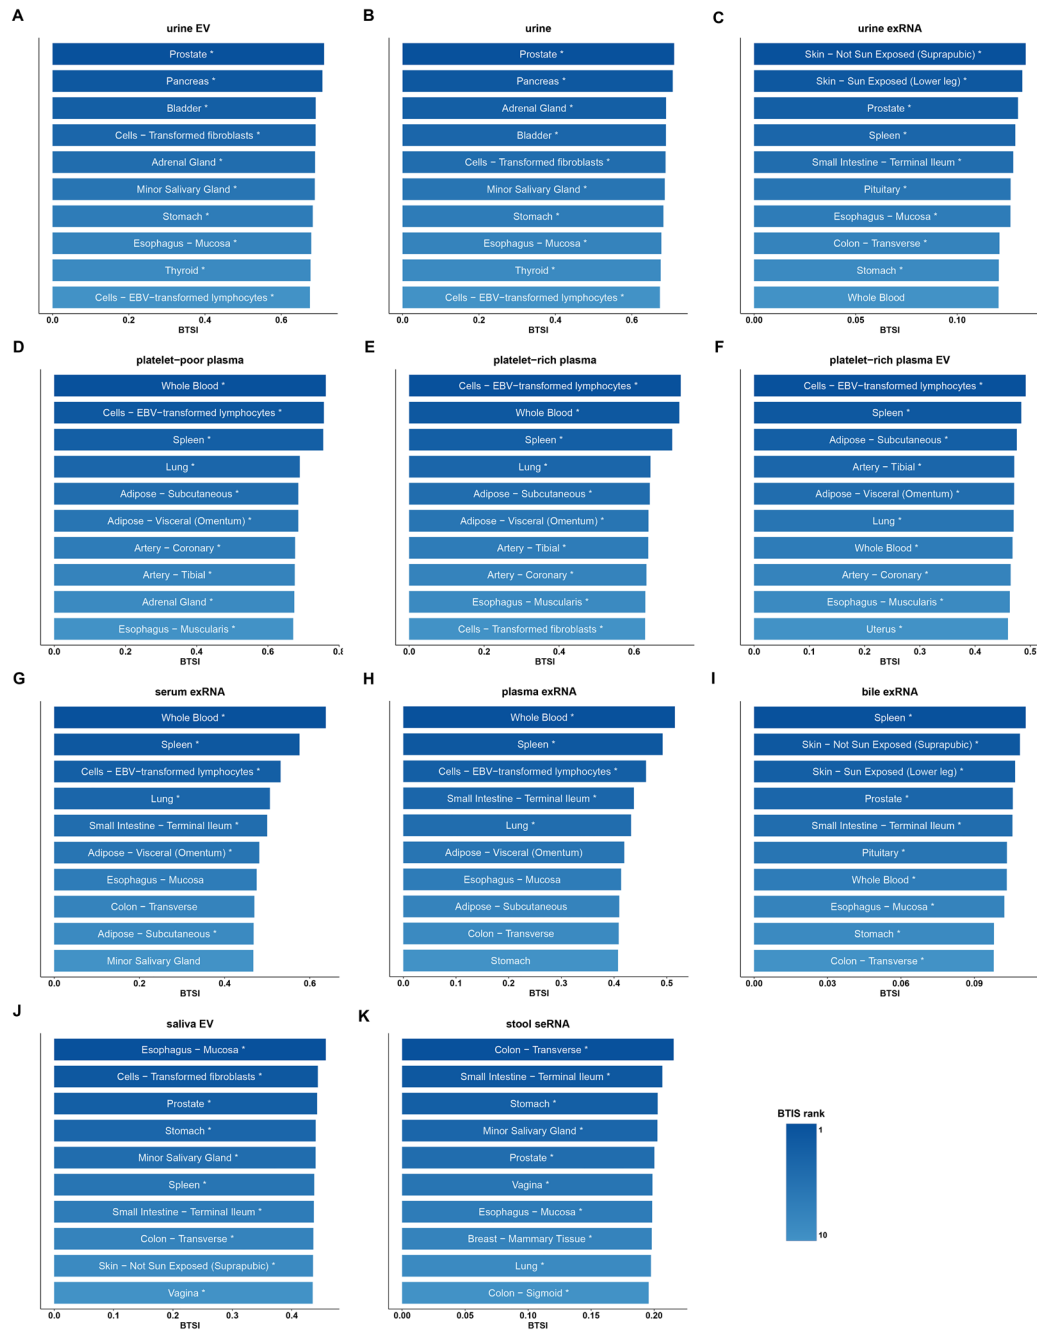

**FIGURE S1. Tendency in BF-mRNAs T-mRNAs correlation.** The bar plot shows the tissues of the top 10 highest BTIS value for each biofluid type from mRNA view. Only tissues significantly correlated with biofluid (Spearman's correlation, P-value < 0.05) and presented higher correlation with biofluid samples than randomized GTEx samples (n = 1000; t-test, 10 times repeat, P-value < 0.05) are labeled using '\*'. The color of each bar represents the rank of the tissue BTIS value for the corresponding biofluid.

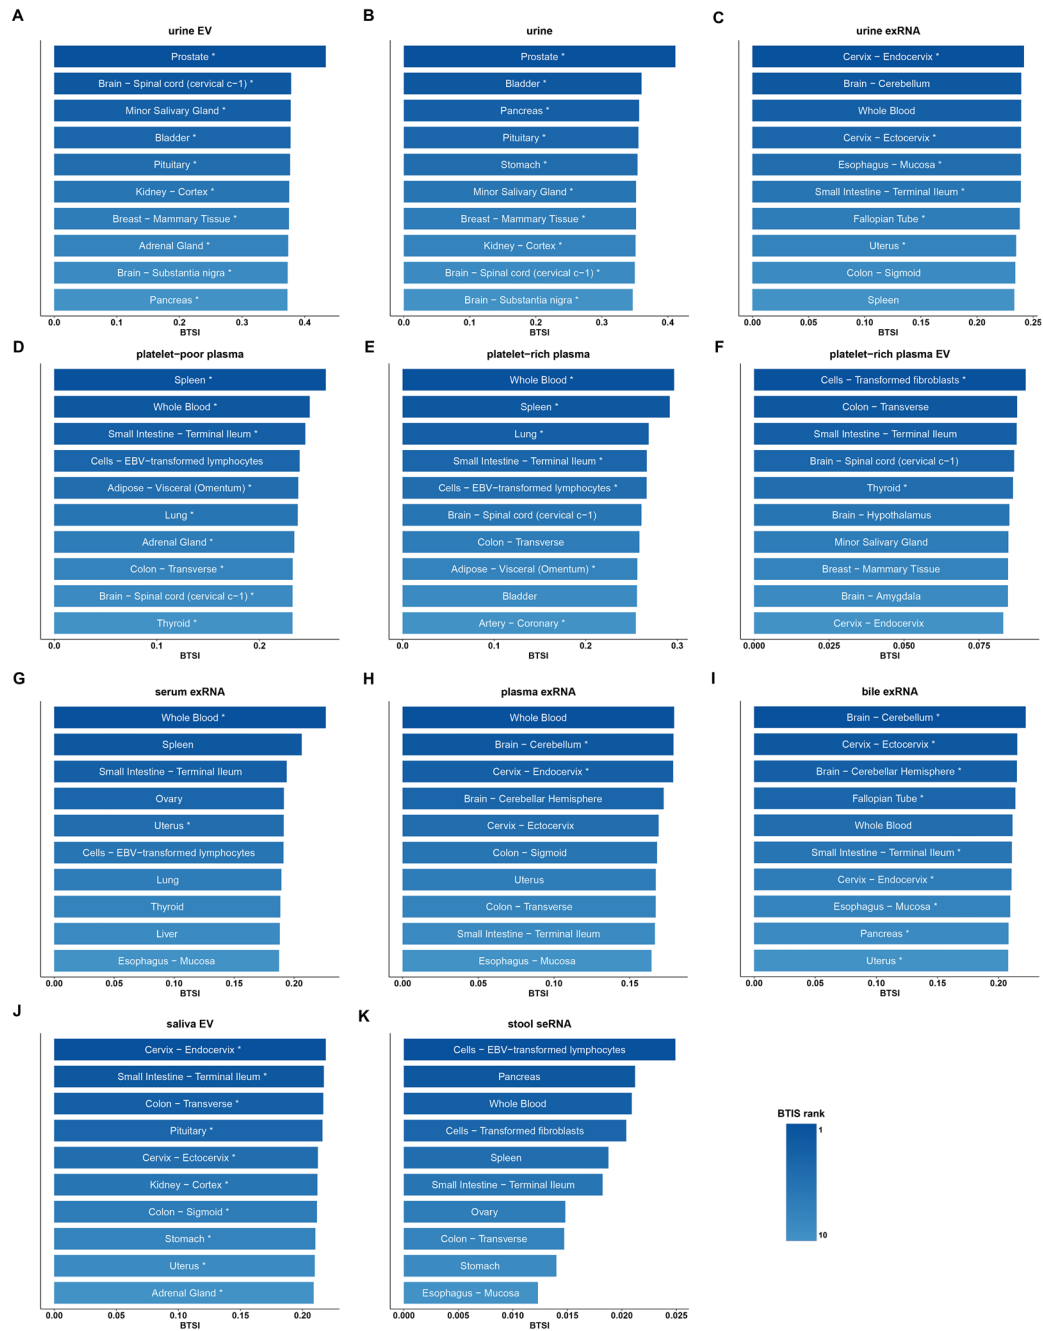

**FIGURE S2. Tendency in BF-lncRNAs T-lncRNAs correlation.** The bar plot shows the tissues of the top 10 highest BTSI value for each biofluid type from lncRNA view. Only tissues significantly correlated with biofluid (Spearman's correlation, P-value < 0.05) and presented higher correlation with biofluid samples than randomized GTEx samples (n = 1000; t-test, 10 times repeat, P-value < 0.05) are labeled using '\*'. The color of each bar represents the rank of the tissue BTSI value for the corresponding biofluid.
